Race Model for the Stop Signal Paradigm Revisited:  
Perfect Negative Dependence

Hans Colonius

Department of Psychology and Cluster of Excellence “Hearing4all”,  
Carl von Ossietzky Universität, Oldenburg, Germany

Adele Diederich

School of Humanities and Social Sciences, Jacobs University Bremen and  
Research Center Neurosensory Science, Carl von Ossietzky Universität, Oldenburg,  
Germany

Race Model for the Stop Signal Paradigm Revisited:  
Perfect Negative Dependence

**Introduction and motivation**

In the stop-signal paradigm, participants perform a response time task (*go task*) and, occasionally, the go stimulus is followed by a stop signal after a variable delay, indicating subjects to withhold their response (*stop task*). The main interest is in estimating the unobservable stop-signal reaction time (SSRT), that is, the latency of the stopping process, as a characterization of the response inhibition mechanism. In the **Independent Race Model** ([1]) the stop-signal task is represented as a race with stochastically **independent** GO and STOP processes. Under certain simplifying assumptions, some statistics of SSRT can be estimated efficiently without making any distributional assumptions on processing times. Neurophysiological studies, however, have shown that the neural correlates of the GO and STOP processes produce saccadic eye movements through a network of **interacting** neurons ([2]). Here we propose a **Dependent Race Model** that assumes perfect negative stochastic dependence between GO and STOP processes. It resolves the apparent paradox between behavioral and neural data but nonetheless retains the distribution-free properties of the Independent Race Model.

**The general race model**

We distinguish two different experimental conditions termed context  $\mathcal{GO}$ , where only a go signal is presented, and context  $\mathcal{STOP}$ , where a stop signal is presented. In  $\mathcal{STOP}$ , let  $T_{go}$  and  $T_{stop}$  denote the random processing time for the go and the stop signal, respectively, with bivariate distribution function

$$H(s, t) = \Pr(T_{go} \leq s, T_{stop} \leq t), \quad (1)$$

where  $H$  has its probability mass concentrated on  $[0, \infty) \times [0, \infty)$ . The marginal distributions of  $H(s, t)$  are denoted as

$$F_{go}(s) = \Pr(T_{go} \leq s, T_{stop} < \infty) \text{ and } F_{stop}(t) = \Pr(T_{go} < \infty, T_{stop} \leq t). \quad (2)$$

In any given trial, a go signal triggering the realization of random processing time  $T_{go}$  is presented either in context  $\mathcal{GO}$  or in context  $\mathcal{STOP}$ , but not in both at the same time. Thus, the distribution of  $T_{go}$  could differ depending on context. However, the general race model rules this out by adding the important **context invariance assumption**: For context  $\mathcal{GO}$ , the distribution of go signal processing time is assumed to be

$$F_{go}(s) = \Pr(T_{go} \leq s) = \Pr(T_{go} \leq s, T_{stop} < \infty), \quad (3)$$

identical to the marginal distribution  $F_{go}(s)$  in the  $\mathcal{STOP}$  context.

In order to simplify calculations, it is further assumed that  $H(s, t)$  is absolutely continuous, so that density functions for the marginals exist, denoted as  $f_{go}(s)$  and  $f_{stop}(t)$ , respectively. Moreover, the partial derivatives of  $H$  are

$$H_1(s, t) = \frac{\partial H}{\partial s}(s, t) \text{ and } H_2(s, t) = \frac{\partial H}{\partial t}(s, t). \quad (4)$$

From these assumptions, the probability  $p_r(t_d)$  of observing a response to the go signal given a stop signal presented at delay  $t_d$  ( $t_d \geq 0$ ) after the go signal, is determined by

$$p_r(t_d) = \Pr(T_{go} < T_{stop} + t_d). \quad (5)$$

To help interpretation, by abuse of notation let us write, for any  $t$ ,

$$\begin{aligned} \Pr(T_{go} = t \cap T_{stop} + t_d > t) &= \Pr(T_{go} = t) - \Pr(T_{go} = t \cap T_{stop} + t_d \leq t) \\ &= f_{go}(t) - H_1(t, t - t_d). \end{aligned}$$

Then,

$$\begin{aligned}
 p_r(t_d) &= \int_0^\infty \Pr(T_{go} = t \cap T_{stop} + t_d > t) dt, \\
 &= \int_0^{t_d} \Pr(T_{go} = t) dt + \int_{t_d}^\infty \Pr(T_{go} = t \cap T_{stop} + t_d > t) dt, \\
 &= F_{go}(t_d) + \int_{t_d}^\infty \Pr(T_{go} = t) dt - \int_{t_d}^\infty \Pr(T_{go} = t \cap T_{stop} + t_d \leq t) dt, \\
 &= 1 - \int_{t_d}^\infty H_1(t, t - t_d) dt.
 \end{aligned} \tag{6}$$

According to the model, the probability of observing a response to the go signal before time  $t$ , given the stop signal was presented  $t_d$  msec later, equals

$$F_{sr}(t | t_d) = \Pr(T_{go} \leq t | T_{go} < T_{stop} + t_d) \tag{7}$$

This response time has sometimes been called *signal-response RT*. Its density is

$$\begin{aligned}
 f_{sr}(t | t_d) &= \Pr(T_{go} = t \cap T_{stop} + t_d > t) / p_r(t_d) \\
 &= f_{go}(t) - H_1(t, t - t_d) / p_r(t_d) \\
 &= \begin{cases} f_{go}(t) / p_r(t_d) & \text{if } t < t_d, \\ \frac{f_{go}(t) - H_1(t, t - t_d)}{p_r(t_d)} & \text{if } t \geq t_d. \end{cases}
 \end{aligned} \tag{8}$$

Thus, the distribution function can be written as

$$\begin{aligned}
 F_{sr}(t | t_d) &= \frac{1}{p_r(t_d)} \int_0^t f_{go}(t') - H_1(t', t' - t_d) dt' \\
 &= \frac{F_{go}(t)}{p_r(t_d)} \quad \text{if } t \leq t_d.
 \end{aligned} \tag{9}$$

For  $t > t_d$ , transformations analogous to those leading to (6) yield

$$\begin{aligned}
 F_{sr}(t | t_d) &= \frac{1}{p_r(t_d)} \int_0^t f_{go}(t') - H_1(t', t' - t_d) dt' \\
 &= \frac{1 - \int_{t_d}^t H_1(t', t' - t_d) dt'}{1 - \int_{t_d}^\infty H_1(t', t' - t_d) dt'}.
 \end{aligned} \tag{10}$$

Observable, or at least estimable from data, are the following components of the general stop signal race model:  $F_{go}(t)$ ,  $F_{sr}(t | t_d)$ , and  $p_r(t_d)$ . The main interest in modeling is to obtain information about the distribution of unobservable stop signal processing time,  $T_{stop}$ .

### Independent race model

[1] suggested the *independent race model* by assuming stochastic independence between  $T_{go}$  and  $T_{stop}$ :

**Stochastic independence assumption.:** for all real-valued  $s, t$

$$H(s, t) = \Pr(T_{go} \leq s) \Pr(T_{stop} \leq t) = F_{go}(s) F_{stop}(t).$$

Therefore, under stochastic independence

$$\begin{aligned} p_r(t_d) &= \int_0^\infty \Pr(T_{go} = t \cap T_{stop} + t_d > t) dt \\ &= \int_0^\infty f_{go}(t) [1 - F_{stop}(t - t_d)] dt. \end{aligned} \quad (11)$$

For the density of the signal-response time distribution  $F_{sr}(t|t_d)$ , we have

$$f_{sr}(t | t_d) = f_{go}(t) [1 - F_{stop}(t - t_d)] / p_r(t_d). \quad (12)$$

As observed in [3], rearranging Equation (12) yields an explicit expression of the distribution of the unobservable stop signal processing time  $T_{stop}$ :

$$F_{stop}(t - t_d) = 1 - \frac{f_{sr}(t | t_d) p_r(t_d)}{f_{go}(t)}. \quad (13)$$

However, as investigated in [4, 5], obtaining reliable estimates for the stop signal distribution using Equation (13) requires unrealistically large numbers of observations in practice. The most common alternative estimation method, called *integration method*, assumes random variable  $T_{stop}$  to be equal to a constant, SSRT, say. Then

$$F_{stop}(t) = \begin{cases} 0, & \text{if } t < \text{SSRT} + t_d; \\ 1 & \text{if } t \geq \text{SSRT} + t_d. \end{cases}$$

Inserting into Equation (11) yields

$$p_r(t_d) = \int_0^{\text{SSRT}+t_d} f_{go}(t) dt. \quad (14)$$

Because estimates of both  $p_r(t_d)$  and  $f_{go}(t)$  are available, this allows estimation of stop signal processing mean SSRT.

### Race model with negative dependence

Motivation: interactive race model based on neural data...Schall etal

**Fréchet-Hoeffding bounds.** Let  $G(x, y)$  be the bivariate distribution function of a pair of random variables  $(X, Y)$ :

$$G(x, y) = P(X \leq x, Y \leq y)$$

with marginal distributions  $F_X$  and  $F_Y$ . Then, it always holds that

$$G^-(x, y) = \max\{F_X(x) + F_Y(y) - 1, 0\} \leq G(x, y) \leq \min\{F_X(x), F_Y(y)\},$$

for all  $x, y$  in the support of  $G$ . Both  $G^-(x, y)$  and  $\min\{F_X(x), F_Y(y)\}$  are known as

*Fréchet bounds* and are distribution functions for  $(X, Y)$  as well. Specifically,  $G^-$

correspond to perfect negative dependence between  $X$  and  $Y$ , while

$G^+(x, y) = \min\{F_X(x), F_Y(y)\}$  corresponds to perfect positive dependence (Nelson20xx).

The upper bound  $G^+$  will not play a role in the following.

**Race model: Negative dependence.** Replacing stochastic independence in the race model by perfect negative dependence between go and stop signal processing time (lower Fréchet bound  $G^-$ ) results in the following joint distribution for  $T_{go}$  and  $T_{stop}$ :

$$H^-(s, t) = \max\{F_{go}(s) + F_{stop}(t) - 1, 0\}. \quad (15)$$

Then,

$$H_2^-(t, t - t_d) = \begin{cases} f_{stop}(t - t_d), & \text{if } F_{go}(t) + F_{stop}(t - t_d) - 1 > 0; \\ 0 & \text{otherwise.} \end{cases} \quad (16)$$

Let

$$A = \{t \mid F_{go}(t) + F_{stop}(t - t_d) - 1 > 0\}. \quad (17)$$

We introduce an indicator function  $\mathbb{1}_{\{A\}}(t)$  with set  $A$  by

$$\mathbb{1}_{\{A\}}(t) = \begin{cases} 1 & \text{if } t \in A, \\ 0 & \text{else,} \end{cases}$$

Then Equation (16) can be rewritten more compactly as

$$H_2^-(t, t - t_d) = f_{stop}(t - t_d) \mathbb{1}_{\{A\}}(t). \quad (18)$$

Clearly,  $H_2^-(t, t - t_d)$  is increasing in  $t$ , so we define the infimum (greatest lower bound) of  $A$ ,

$$t^* = \inf A, \quad (19)$$

and observe that  $t^* > t_d$ .

Next, we consider the signal-response RT distribution. It is more convenient to write it in terms of  $H_2$  rather than  $H_1$ :

$$\begin{aligned} F_{sr}(t \mid t_d) &= \Pr(T_{go} \leq t \mid T_{go} < T_{stop} + t_d) \\ &= \int_0^t H_2(t', t' - t_d) dt' / p_r(t_d) \\ &= \int_0^t f_{stop}(t - t_d) \mathbb{1}_{\{A\}}(t) dt' / p_r(t_d) \\ &= \int_{t^*}^t f_{stop}(t - t_d) dt' / p_r(t_d). \end{aligned} \quad (20)$$

Multiplying by  $p_r(t_d)$  and evaluating the integral,

$$p_r(t_d) F_{sr}(t \mid t_d) = F_{stop}(t - t_d) - F_{stop}(t^* - t_d). \quad (21)$$

Letting  $t \rightarrow \infty$  yields

$$p_r(t_d) = 1 - F_{stop}(t^* - t_d). \quad (22)$$

Finally, using (22) we can rewrite Equation (21),

$$p_r(t_d) F_{sr}(t \mid t_d) = F_{stop}(t - t_d) - [1 - p_r(t_d)]$$

and solve for the unobservable stop signal distribution,

$$F_{stop}(t - t_d) = 1 - p_r(t_d)[1 - F_{sr}(t | t_d)] \quad (23)$$

for all  $t \geq t^*$ .

Comparing this with the case of independence (Equation 13)

$$F_{stop}^{IND}(t - t_d) = 1 - \frac{f_{sr}(t | t_d)p_r(t_d)}{f_{go}(t)}, \quad (24)$$

we see that perfect negative dependence replaces the ratio  $f_{sr}(t | t_d)/f_{go}(t)$  by the much simpler expression  $1 - F_{sr}(t | t_d)$ . Moreover, the expected value of  $T_{stop}$  is easy to compute:

$$\begin{aligned} E[T_{stop}] &= \int_{t_d}^{\infty} [1 - F_{stop}(t - t_d)] dt \\ &= p_r(t_d) \int_{t^*}^{\infty} [1 - F_{sr}(t | t_d)] dt \\ &= p_r(t_d) E[T_{go} | T_{go} < T_{stop} + t_d]. \end{aligned} \quad (25)$$

### Example 1: Exponential Go and Stop distributions

While exponentially distributed go or stop signal reaction times lack empirical support, this first example serves to illustrate the difference between independent and negatively dependent race models. It also helps probing the derivations made so far.

#### Independent exponentially distributed $T_{go}$ and $T_{stop}$

In addition to the assumptions of the general race model, we define independent, exponential distributions for  $T_{go}$  and  $T_{stop}$  with parameters  $\lambda_{go} > 0$  and  $\lambda_{stop} > 0$  for context *STOP* by

$$\begin{aligned} H(s, t) &= \Pr(T_{go} \leq s) \Pr(T_{stop} \leq t) \\ &= (1 - \exp[-\lambda_{go} s])(1 - \exp[-\lambda_{stop} t]), \end{aligned}$$



for all  $s, t \geq 0$ . Inserting into (11),

$$\begin{aligned}
 p_r(t_d) &= \Pr(T_{go} < T_{stop} + t_d) \\
 &= \int_0^\infty f_{go}(t) [1 - F_{stop}(t - t_d)] dt \\
 &= \int_0^{t_d} f_{go}(t) dt + \int_{t_d}^\infty f_{go}(t) [1 - F_{stop}(t - t_d)] \\
 &= 1 - \exp[-\lambda_{go} t_d] + \frac{\lambda_{go}}{\lambda_{stop} + \lambda_{go}} \exp[-\lambda_{go} t_d] \\
 &= 1 - \frac{\lambda_{stop}}{\lambda_{stop} + \lambda_{go}} \exp[-\lambda_{go} t_d].
 \end{aligned} \tag{26}$$

For  $t > t_d$ , the density of the signal-response distribution is given by,

$$\begin{aligned}
 f_{sr}(t | t_d) &= f_{go}(t) [1 - F_{stop}(t - t_d)] / p_r(t_d) \\
 &= \lambda_{go} \exp[-\lambda_{go} t] \exp[-\lambda_{stop}(t - t_d)] / \left( 1 - \frac{\lambda_{stop}}{\lambda_{stop} + \lambda_{go}} \exp[-\lambda_{go} t_d] \right) \\
 &= \frac{1}{K} (\lambda_{go} + \lambda_{stop}) \exp[-(\lambda_{go} + \lambda_{stop})(t - t_d)],
 \end{aligned} \tag{27}$$

with  $K = \exp[\lambda_{go} t_d] (1 + \lambda_{stop}/\lambda_{go}) - \lambda_{stop}/\lambda_{go}$ . Note that for  $t_d = 0$ , we have  $K = 1$  and the signal-response density is identical to an exponential density for an independent race between  $T_{stop}$  and  $T_{go}$ , with parameter  $\lambda_{go} + \lambda_{stop}$  and  $p_r(t_d) = \lambda_{go}/(\lambda_{go} + \lambda_{stop})$ .

For  $t \leq t_d$ , the density simplifies to

$$\begin{aligned}
 f_{sr}(t | t_d) &= f_{go}(t) / p_r(t_d) \\
 &= \frac{\lambda_{go} \exp[-\lambda_{go} t]}{\frac{\lambda_{go}}{\lambda_{stop} + \lambda_{go}} \exp[-\lambda_{go} t_d]} \\
 &= \frac{1}{\lambda_{stop} + \lambda_{go}} \exp[-\lambda_{go}(t - t_d)].
 \end{aligned} \tag{28}$$

Comparing the distribution for go-signal response times,  $F_{go}(t)$ , with the signal-response distribution,  $F_{sr}(t | t_d)$ , yields the typical fan shape for varying values of  $t_d$  (see Figure 1).

Computation of the expected value of signal-response RTs is straightforward:

$$\begin{aligned}
 E[T_{go} | T_{go} < T_{stop} + t_d] &= \int_0^{\infty} f_{sr}(t | t_d) dt \\
 &= \int_0^{\infty} t f_{go}(t) [1 - F_{stop}(t - t_d)] / p_r(t_d) \\
 &= \frac{1}{p_r(t_d)} \frac{\lambda_{go}}{(\lambda_{go} + \lambda_{stop})^2} \exp[\lambda_{stop} t_d] \\
 &= \frac{\lambda_{go} \exp[\lambda_{go} + \lambda_{stop}]}{(\lambda_{go} + \lambda_{stop})([\exp[\lambda_{go} t_d](\lambda_{go} + \lambda_{stop}) - \lambda_{stop})]}. \tag{29}
 \end{aligned}$$

In particular, for  $t_d = 0$ , we obtain  $E[T_{go} | T_{go} < T_{stop} + t_d] = 1/(\lambda_{go} + \lambda_{stop})$ , consistent with the density we mentioned above for this value of the stop signal delay.

### Perfect negative dependence between exponentially distributed $T_{go}$ and $T_{stop}$

For the bivariate distribution of  $(T_{go}, T_{stop})$ , we have

$$\begin{aligned}
 H^-(s, t) &= \max\{F_{go}(s) + F_{stop}(t) - 1, 0\} \\
 &= \max\{1 - \exp[-\lambda_{go} s] + 1 - \exp[-\lambda_{stop} t] - 1, 0\} \\
 &= \max\{1 - \exp[-\lambda_{go} s] - \exp[-\lambda_{stop} t], 0\}. \tag{30}
 \end{aligned}$$

Then, from (16)

$$H_2^-(t, t - t_d) = \begin{cases} \lambda_{stop} \exp[-\lambda_{stop} (t - t_d)] & \text{if } \exp[-\lambda_{go} t] + \exp[-\lambda_{stop} (t - t_d)] < 1; \\ 0 & \text{otherwise.} \end{cases} \tag{31}$$

Defining set  $A$  as before in (17),

$$\begin{aligned}
 A &= \{t | F_{go}(t) + F_{stop}(t - t_d) - 1 > 0\} \\
 &= \{t | \exp[-\lambda_{go} t] + \exp[-\lambda_{stop} (t - t_d)] < 1\}, \tag{32}
 \end{aligned}$$

this can be rewritten as

$$H_2^-(t, t - t_d) = \lambda_{stop} \exp[-\lambda_{stop} t] \mathbb{1}_{\{A\}}(t). \tag{33}$$

Here, the smallest value  $t^*$  satisfying the condition in (32) is a function of the parameters:

$$t^*(t_d, \lambda_{go}, \lambda_{stop}) = \min\{t \mid \exp[-\lambda_{go} t] + \exp[-\lambda_{stop} (t - t_d)] < 1\}. \quad (34)$$

For  $\lambda_{go} = \lambda_{stop} = \lambda$ , solving for  $t^*$  yields

$$t^* = \lambda^{-1} \log(1 - \exp[-\lambda t_d]).$$

When  $\lambda_{go} \neq \lambda_{stop}$ , there is no closed-form solution but  $t^*$  is easily obtainable to arbitrary precision by numerical algorithms (e.g. Newton-Raphson).

For the signal-response RT distribution  $F_{sr}(t \mid t_d)$  we obtain, from inserting exponential distributions into (21) and (22),

$$\begin{aligned} F_{sr}(t \mid t_d) &= \frac{F_{stop}(t - t_d) - F_{stop}(t^* - t_d)}{1 - F_{stop}(t^* - t_d)} \\ &= 1 - \exp[-\lambda_{stop} (t - t^*)]. \end{aligned} \quad (35)$$

Although not made explicit in (35), note that the signal-response distribution function  $F_{sr}$  does depend on  $t_d$  via the value of  $t^*$ , that is, there is a shift-dependency on  $t_d$ . Figure 2 depicts the no-stop signal distribution  $F_{go}$  together with signal-response distribution  $F_{sr}(t \mid t_d)$  for different  $t_d$  values employing the same parameters as in the independence case above ( $\lambda_{go} = .01, \lambda_{stop} = .02$ ). Computing the values of  $t^*$  according to (34) required finding the fixed point of recursion (Newton-Raphson)

$$t_{n+1} = t_n - \frac{1 - \exp[-\lambda_{go} t_n] - \exp[-\lambda_{stop} (t_n - t_d)]}{\exp[-\lambda_{go} t_n] + \exp[-\lambda_{stop} (t_n - t_d)]}, \quad (36)$$

which was determined using function `FixedPoint` of Mathematica<sup>®</sup>. From (25) the expected value for the signal-response distribution is very easy to determine:

$$\begin{aligned} \mathbb{E}[T_{go} \mid T_{go} < T_{stop} + t_d] &= \frac{1}{p_r(t_d)} \mathbb{E}[T_{stop}] \\ &= \frac{1}{p_r(t_d) \lambda_{stop}} \\ &= \frac{\exp[\lambda_{stop}(t^* - t_d)]}{\lambda_{stop}}. \end{aligned} \quad (37)$$

### Final comments

- Just like the Independent Race Model, the *Dependent Race Model* provides a distribution-free measure of the latency of the STOP process;
- by assuming perfect negative dependence between GO and STOP process, the Dependent Race Model constitutes a behavioral framework that is consistent with the finding of mutually inhibitory gaze-holding and gaze-shifting neurons ([6]).

### References

- [1] G. Logan and W. Cowan, “On the ability to inhibit thought and action: a theory of an act of control,” Psychological Review, vol. 91, no. 3, pp. 295–327, 1984.
- [2] L. Boucher, T. Palmeri, G. Logan, and J. Schall, “Inhibitory control in mind and brain: an interactive race model of countermanding saccades,” Psychological Review, vol. 114, no. 2, pp. 376–397, 2007.
- [3] H. Colonius, “A note on the stop-signal paradigm, or how to observe the unobservable.,” Psychological Review, vol. 97, no. 2, pp. 309–312, 1990.
- [4] G. Band, M. van der Molen, and G. Logan, “Horse-race model simulations of the stop-signal procedure,” Acta Psychologica, vol. 112, pp. 105–142, 2003.
- [5] D. Matzke, C. Dolan, G. Logan, S. Brown, and E.-J. Wagenmakers, “Bayesian parametric estimation of stop-signal reaction time distributions,” Journal of Experimental Psychology: General, vol. 142, no. 4, pp. 1047–1073, 2013.
- [6] D. Hanes, W. Patterson, and J. Schall, “Role of frontal eye field in countermanding saccades: visual, movement and fixation activity,” Journal of Neurophysiology, vol. 79, pp. 817–834, 1998.

### Acknowledgments

Supported by DFG (German Science Foundation) SFB/TRR-31 (Project B4, HC), DFG Cluster of Excellence EXC 1077/1 Hearing4all (HC) and DFG Grant DI 506/12-1 (AD)

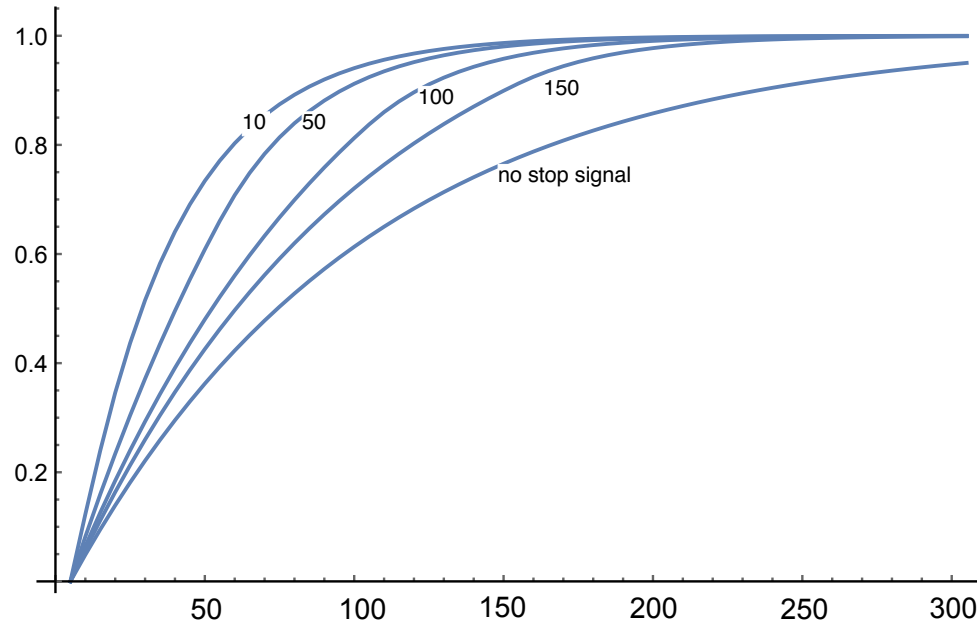

Figure 1. Independent (exponential) race model:  $F_{go}(t)$  (no-stop signal distribution) compared to  $F_{sr}(t | t_d)$  (signal-respond distribution) for  $t_d = 10, 50, 100, 150$  [msec] with  $\lambda_{go} = .01$  and  $\lambda_{stop} = .02$ .

## DEPENDENT RACE MODEL

14

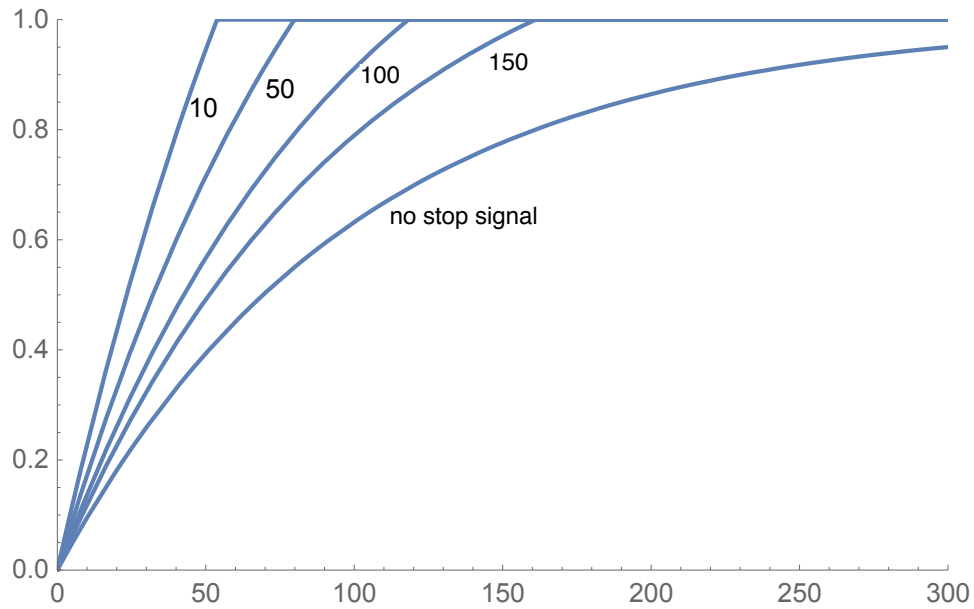

Figure 2. Negatively dependent (exponential) race model:  $F_{go}(t)$  (no-stop signal distribution) compared to  $F_{sr}(t|t_d)$  (signal-respond distribution) for  $t_d = 10, 50, 100, 150$  [msec] with  $\lambda_{go} = .01$  and  $\lambda_{stop} = .02$ .
